# Supplementary material for: Synthesis of hydrolytically stable porphyrin C- and S-glycoconjugates in high yields
Source: Royal Society of Chemistry journal article supplement (doi:10.1039/b008489l), 2001-01-01
Supplement: b008489l.doc [file b008489l.doc]

**Supplementary materials:**

Experimental

**(4-Bromomethylphenylmethyl)-2,3,4,6-tetrakis-*O*-acetyl-1-thio-**-d-glucopyranoside (1)**.

Sodium hydride (NaH 60% in mineral oil, 220 mg, 5.5 mmol) was added to a solution of 2,3,4,6-tetra-O-acetyl-thio--D-glucopyranose (2.0 g, 5.5mmol) in dry THF (30 ml). Such mixture was added dropwise to a solution of ’-dibromo-*p*-xylene (3.0 g, 11.4 mmol) in dry THF (30 ml). The mixture was stirred under nitrogen at room temperature for 2h. Then the solvent was partially evaporated, water was added and the mixture was extracted with dichloromethane. The organic phase was dried over sodium sulfate and the solvent was evaporated. The product was purified by column chromatography (solvent CH2Cl2) to obtain 2.41g (90% yield) of the oil **1**.

1H-NMR (CDCl3, 500 MHz):  7.35 (2H, d, J = 8.6 Hz), 7.28 (2H, d, J = 8.6 Hz), 5.16 (1H, t, J = 9.8 Hz, H-3), 5.08 (2H, t, J = 9.8 Hz, H-2 and H-4), 4.49 (2H, s, H-8’), 4.31 (1H, d, J = 9.8 Hz, H-1), 4.24 (1H, dd, J = 12.2, 2.4 Hz, H-6a), 4.13 (1H, dd, J = 12.2, 2.4 Hz, H-6b), 3.93 (1H, d, J = 12.8 Hz, H-1’a), 3.82 (1H, d, J = 12.8 Hz, H-1’b), 3.61 (1H, ddd, J = 9.8, 4.9, 2.4 Hz, H-5), 2.11 (3H, s, Ac), 2.024 (3H, s, Ac), 2.020 (3H, s, Ac), 2.00 (3H, s, Ac).

13C-NMR (CDCl3, 75 MHz):  170.61, 170.20, 169.43, 137.40, 137.13, 129.64, 129.45, 82.25, 76.14, 74.06, 70.07, 68.69, 62.48, 33.65, 33.30, 21.05, 20.94, 20.85.

ESI MS (calcd for C22H27BrO9S: 546/548) *m/z* (rel. intensity): 572 (20), 571 (M+Na+) (76), 569 (M+Na+) (66), 567 (26), 566 (M+NH4+) (100), 565 (28), 564 (M+NH4+) (96).

**(4-*O*-*tert*-Butyldimethylsilylmethylphenylmethyl)-2,3,4,6-tetrakis-*O*-acetyl-1-thio-**-d-glucopyranoside (2).** Silver triflate (880 mg, 3.42 mmol) and *tert*-butyldimethylsilanol (0.54 ml, 3.43 mmol) were added to a solution of **1** (1.50 g, 2.74 mmol) and 2,6-di-*tert*-butyl-4-methylpyridine (705 mg, 3.43 mmol) in dry dichloromethane (40 ml) under N2 at 0 ºC. The mixture was stirred for 15 min, then the cooling bath was removed and stirring was continued for 1h. The mixture was filtered over celite and the solvent evaporated. Flash chromatography (Petroleum ether, EtOAc 20%) yielded the product (1.23g , 60%).

[]25d = -78 (c = 1.36, CHCl3)

1H-NMR (CDCl3, 500 MHz):  7.28 (2H, d, J = 8.5 Hz), 7.25 (2H. d, J = 8.5), 5.14 (1H, t, J = 9.2 Hz, H-3), 5.072 (1H, t, J = 9.8 Hz, H-2 or H-4), 5.070 (1H, t, J = 9.8 Hz, H-4 or H-2), 4.74 (2H, s, H-8’), 4.27 (1H, d, J = 9.8 Hz, H-1), 4.24 (1H, dd, J = 12.2, 4.9 Hz, H-6a), 4.15(1H, dd, J = 12.2, 2.4 Hz, H-6b), 3.93 (1H, d, J = 12.8 Hz, H-1’a), 3.82 (1H, d, J = 12.8 Hz, H-1’b), 3.59 (1H, ddd, J = 9.8, 4.9, 2.4 Hz, H-5), 2.12(3H, s), 2.02 (3H, s), 2.01 (3H, s), 1.99 (3H, s), 0.95 (9H, s), 0.11 (6H, s).

13C-NMR (CDCl3, 75 MHz):  170.62, 170.20, 169.43, 140.86, 135.42, 129.08, 126.44, 82.13, 76.10, 74.14, 70.13, 68.73, 64.93, 62.52, 33.84, 26.27, 21.16, 21.05, 20.95, 20.88, 18.75, -4.87.

Anal. calcd for C28H42O10SSi: C, 56.16; H, 7.07; S, 5.36. Found: C, 55.98; H, 6.83; S, 5.51.

ESI MS (calcd for C28H42O10SSi: 598) *m/z* (rel. intensity): 623 (16), 622 (36), 621 (M+Na+) (100), 618 (6), 617 (19), 616 (M+ NH4+), 467 (35).

**(4-*O*-*tert*-Butyldimethylsilylmethylphenylmethyl)-2,3,4,6-tetrakis-*O*-benzyl-1-thio-**-d-glucopyranoside (3).** The thioglucoside **2** (390 mg, 0.63 mmol) was dissolved in dry methanol (10 ml) and treated with sodium methoxide (0.5 M in MeOH, 0.5 ml). The solution was stirred at room temperature for 1h, then acidic resin (DOWEX 50X8-400. Ion-exchange resin. Strong acidic. 0.3 g) was added and the mixture filtered. The filtrate was collected and the solvent was removed in vacum and then dissolved in dry THF (10 ml) and dry DMF (10 ml). Sodium hydride (60% dispersion in mineral oil, 125 mg) was added. Then benzyl bromide (580 mg, 3.4 mmol) and tetrabutylammonium iodide (60 mg) was added. The mixture was stirred for 8 hours at room temperature under nitrogen. The product was extracted with dichloromethane and the organic layer was washed with a solution of ammonium chloride. The organic layer was dried over sodium sulfate and the solvent was evaporated. Flash column chromatography (eluent: petroleum ether, EtOAc 10%) yielded 402 mg (80%) of the oil **3**.

[]25d = -35 (c = 1.23, CHCl3)

1H-NMR (CDCl3, 500 MHz):  7.38-7.21 (22H, m), 7.17-7.14 (2H, m), 4.86 (1H, d, J = 11.0 Hz), 4.83 (1H, d, J = 11.0 Hz), 4.80 (1H, d, J = 11.0 Hz), 4.79 (1H, d, J = 11.0 Hz), 4.71 (2H, s), 4.67 (1H, d, J = 10.4 Hz), 4.63 (1H, d, J = 11.0 Hz), 4.57 (1H, d, J = 11.0 Hz), 4.55 (1H, d, J = 11.0 Hz), 4.26 (1H, d, J = 9.2 Hz, H-1), 4.00 (1H, d, J = 12.8 Hz, H-1’a), 3.86 (1H, d, J = 13.4 Hz, H-l’b), 3.74 (1H, dd, J = 11.0, 1.8 Hz, H-6a), 3.69 (1H, dd, J = 11.0, 4.9 Hz, H-6b), 3.62-3.57 (2H, m, H-3 and H-4), 3.47 (1H, t, J = 9.2 Hz, H-2), 3.38 (1H, ddd, J = 9.8, 4.9, 1.8 Hz, H-5), 0.94 (9H, s), 0.10 (6H, s).

13C-NMR (CDCl3, 75 MHz):  140.44, 138.66, 138.40, 138.24, 138.11, 136.28, 129.18, 128.51, 128.49, 128.46, 128.37, 128.03, 127.90, 127.88, 127.83, 127.73, 127.71, 126.35, 86.84, 83.37, 81.94, 79.20, 78.29, 75.90, 75.51, 75.21, 73.70, 69.42, 65.00, 34.35, 26.29, -4.86.

Anal. calcd for C48H58O6SSi: C, 72.87; H, 7.39; S, 4.05. Found: C, 72.76; H, 7.25; S, 3.91.

ESI MS (calcd for C48H58O6SSi: 790) *m/z* (rel. intensity): 815 (11), 814 (23), 813 (M+Na+) (39), 811 (6), 810 (27), 809 (63), 808 (M+NH4+).

**(4-*O*-*tert*-Butyldimethylsilylmethylphenylmethyl)-2,3,4,6-tetrakis-*O*-benzyl-1-sulfonyl-**-d-glucopyranoside (4).** The thioether **3** (320 mg, 0.40 mmol) was dissolved in THF (5 ml), ethanol (5ml) and water (5 ml). Magnesium monoperoxyphthalate hexahydrate (MMPP, 1.5 g) was added and the mixture was stirred for 2h at ~60 ºC. The solvent was partially evaporated. Water is added and the product was extracted with dichloromethane. The organic layer was dried over sodium sulfate and the solvent evaporated. Flash column chromatography (petroleum ether, EtOAc 10%) yielded the oil **4 (**280 mg, 87%).

[]25d = -2.9 (c = 1.05, CHCl3)

1H-NMR (CDCl3, 500 MHz):  7.44 (2H, d, J = 7.9 Hz), 7.38-7.23 (20H, m), 7.17-7.14 (2H, m), 4.96 (1H, d, J = 9.8 Hz), 4.90 (1H, d, J= 11.6 Hz), 4.80 (1H, d, J = 11.0 Hz), 4.80 (1H, d, J = 11.0 Hz), 4.71 (2H, s), 4.70 (1H, d, J = 12.2 Hz), 4.58 (2H, s), 4.56 (1H, d, J = 13.4 Hz), 4.53 (1H, d, J = 10.4 Hz), 4.133 (1H, d, J = 14.0 Hz), 4.129 (1H, d, J = 9.2 Hz, H-1), 4.06 (1H, d, J = 9.2 Hz, H-2), 3.75 (1H, dd, J = 11.0, 1.8 Hz, H-6a), 3.69-3.63 (2H, m, H-6b and H-3), 3.54-3.47 (2H, m, H-4 and H-5), 0.94(9H, s), 0.10 (6H, s).

13C-NMR (CDCl3, 75 MHz):  142.49, 138.27, 137.92, 137.75, 137.53, 131.12, 128.80, 128.57, 128.46, 128.15, 128.08, 127.95, 127.86, 127.75, 126.53, 126.04, 86.92. 86.26, 79.67, 77.40, 77.11, 76.06, 75.64, 75.37, 73.72, 69.25,64.77, 57.24, 26.27, 18.74, -4.91.

Anal. calcd for C48H58O6SSi: C, 70.04; H. 7.10. Found: C, 69.81; H, 7.05.

ESI MS (calcd for C48H58O6SSi: 822) *m/z* (rel. intensity): 847 (12), 846 (28), 845 (M+Na+) (47), 843 (9), 842 (24), 841 (55), 840 (M+NH4+) (100).

**2,6-Anhydro-1-deoxy-1-(4-*O*-*tert*-butyldimethylsilylmethylphenylmethyl)-3,4,5,7-tetrakis-*O*-benzyl-d-gluco-hept-1-enitol (5).** The sulfone **4** (200 mg, 0.24 mmol) was dissolved in dichloromethane (5 ml) and butanol (5 ml). Then 1.8 g of 25% KOH/alumina was added. The mixture was cooled in an ice bath and 1 ml of difluorodibromomethane was added. The mixture was stirred at 0 ºC for 1 h and at room temperature for 3h. The mixture was filtered through celite, the filtrate was collected and the solvent was evaporated. The crude was purified by flash column chromatography (petroleum ether, EtOAc 5%) to obtain 160 mg of **5** (88% yield). The product consists of a mixture of the two isomers **Z-5** and **E-5** in the ratio Z/E = 4/1.

In some cases the -bromosulfone **6** was isolated from the reaction mixture.

1H-NMR (CDCl3, 500 MHz):  7.56 (2H, d, J = 8.5 Hz), 7.40-7.16 (22H, Z-isomer and

18H, E-isomer), 7.10 (2H, d, J = 7.9 Hz, E-isomer), 7.02-6.99 (2H, m, E-isomer), 6.47 (1H, s, H-1, E-isomer), 5.73 (1H, s, H-1, Z-isomer), 4.81-4.48 (10H, Z-isomer and 8H, E-isomer, series of d), 4.42 (1H, d, J = 11.6 Hz, E-isomer), 4.37 (1H, d, J = 11.6, E-isomer), 4.12 (1H, d, J = 12.2, E-isomer), 4.09 (1H, ddd, J = 9.8, 4.3, 1.8 Hz, H-6), 4.03 (1H, d, J = 4.3Hz, H-3, Z-isomer), 3.91-3.73 (5H, m), 0.97 (9H, s, E-isomer), 0.94 (9H, s, Z-isomer), 0.13 (9H, s, E-isomer), 0.10 (9H, s, Z-isomer).

ESI MS (calcd for C48H56O6Si: 756) *m/z* (rel. intensity): 781 (10), 780 (25), 779 (M+Na+) (45), 776 (21), 775 (58), 774 (M+NH4+) (100), 651 (18), 650 (52), 649 (-OBn) (96).

**2,6-Anhydro-1-deoxy-1-(4-*O*-*tert*-butyldimethylsilylmethylphenylmethyl)-3,4,5,7-tetrakis-*O*-benzyl-**-d-gluco-heptitol (7).** The glucal **5** (250 mg, 0.33 mmol) was dissolved in EtOAc (8 ml) in the presence of 20 mg of Pd 5% on alumina. The mixture was stirred under hydrogen (balloon) for 12 hours and then it was filtered over celite. The solvent was removed in vacuo to obtain 240 mg (95% yield) of the C-glucoside **7**.

[]25d = +2.2 (c = 0.89, CHCl3).

1H-NMR (CDCl3, 500 MHz):  7.36-7.22 and 7.21-7.18 (24H, m), 4.93 (2H, d, J = 11.0 Hz), 4.88 (1H, d, J = 11.0 Hz), 4.82 (1H, d, J = 11.0 Hz), 4.69 (2H, s), 4.66 (1H, d, J = 11.0 Hz), 4.60 (1H, d, J = 11.0 Hz), 4.57 (1H, d, J = 12.2 Hz), 4.50(1H, d, J = 12.2 Hz), 3.71 (1H, t, J = 9.2 Hz, H-4 or H-5), 3.68-3.62 (3H, m, H-7a, H-7b and H-5 or H-4), 3.47 (1H, dt, J = 9.2, 1.8 Hz H-2), 3.37-3.31 (2H, m, H-3 and H-6), 3.14 (1H, dd, J = 14.0, 1.8 Hz, H-1a), 2.72 (1H, dd, J = 14.0, 9.2 Hz, H-1b), 0.94 (9H, s), 0.09 (6H, s).

13C-NMR (CDCl3, 75 MHz):  139.32, 138.80, 138.61, 138.44, 138.41, 137.56, 129.64, 128.56, 128.52, 128.43, 128.03, 127.92, 127.82, 127.79, 127.72, 127.59, 126.03, 87.67, 82.02, 80.33, 79.27, 78.94, 75.73, 75.32, 75.16, 73.66, 69.26, 65.14, 37.90, 26.31, 18.76, -4.87.

Anal. calcd for C48H58O6Si: C, 75.95; H, 7.70. Found: C, 76.00, H, 7.59.

ESI MS (calcd for C48H58O6Si: 758) *m/z* (rel. intensity): 783 (6), 782 (23), 781 (M+Na+) (25), 778 (21), 777 (55), 776 (M+NH4+) (100).

**2,6-Anhydro-1-deoxy-1-(4-hydroxymethylphenylmethyl)-3,4,5,7-tetrakis-*O*-benzyl-**-d-gluco-heptitol (8).** The silyl ether **7** (250 mg, 0.33 mmol) was dissolved in 5 ml of THF. Tetrabutylammonium fluoride (350 l, 1.0 M in THF) was added and the solution was stirred at room temperature for 2 hours. Brine was added and the product was extracted with dichloromethane. The organic layer was washed with water. The solvent was evaporated and the product was purified by column chromatography (petroleum ether, EtOAc 20%) to obtain 202 mg (95% yield) of the product **8**.

Melting point: 75-76 ºC.

1H-NMR (CDCl3, 500 MHz):  7.36 (24H, m), 4.94 (1H, d, J = 11.0 Hz), 4.93 (1H, d, J = 11.0 Hz), 4.88 (1H, d, J = 11.0 Hz), 4.82 (1H, d, J = 11.0 Hz), 4.66 (1H, d, J = 11.0 Hz), 4.62-4.58 (3H, m), 4.54 (1H, d, J = 12.2 Hz), 4.47 (1H, d, J = 12.2 Hz), 3.72 (1H, t, J = 9.2 Hz, H-4 or H-5), 3.68 (1H, dd, J = 11.0, 1.8 Hz, H-7a), 3.64 (1H, dd, J = 11.0, 4.3 Hz, H-7b), 3.62 (1H, t, J = 9.2 Hz, H-5 or H-4), 3.47 (1H, dt, J = 9.2, 2.4 Hz, H-2), 3.34 (1H, t, J = 9.2 Hz. H-3), 3.36-3.32 (1H, m, H-6), 3.14 (1H, dd, J = 14.1, 1.8 Hz, H-1a), 2.72 (1H, dd, J = 14.1, 9.2 Hz, H-1b), 1.52 (1H, t, J = 6.1 Hz, OH).

13C-NMR (CDCl3, 75 MHz):  138.84, 138.71, 138.57, 138.42, 138.37, 138.32, 129.97, 128.60, 128.55, 128.51, 128.41, 128.02, 127.99, 127.93, 127.84, 127.81, 127.78, 127.73, 127.63, 126.98, 87.62, 82.00, 80.21, 79.31, 78.92. 75.75, 75.31, 75.15, 73.65, 69.33, 65.47, 37.91.

**2,6-Anhydro-1-deoxy-1-(4-formylphenylmethyl)-3,4,5,7-tetrakis-*O*-benzyl-**-d-gluco-heptitol (9).** A solution of oxalyl chloride (80 l, 0.9 mmol) in dry dichloromethane (3ml) under nitrogen was cooled at –78 ºC and a solution of DMSO (120 l, 1.6 mmol) in dry dichlorometane (0.5 ml) is added. Stirring was continued at –78 ºC for 20 min followed by dropwise addition of **8** (213 mg, 0.33 mmol) dissolved in dry dichlorometane (3 ml). The mixture was stirred at –78 ºC under N2 for 45 min, then Et3N (0.4 ml) was added dropwise and the mixture was stirred for 15 min. The cooling bath was removed and the mixture was stirred for 30 min. The mixture was diluted with dichlorometane (10 ml) and the organic solution was washed with aq NH4Cl. The organic layer was dried over Na2SO4 and the solvent evaporated. Flash column chromatography (petroleum ether, EtOAc 20%) yielded **9** (180 mg, 85%).

Melting point: 92-94 ºC.

[]25d = -1.9 (c = 5.4, CH2Cl2).

1H-NMR (CDCl3, 500 MHz):  9.94 (1H, s, H-7’), 7.74 (2H, d, J = 7.7 Hz), 7.41 (2H, d, J = 7.7 Hz), 7.38-7.26 (18H, m), 7.20 (2H, m), 4.96 (1H, d, J = 10.5 Hz), 4.94 (1H, d, J = 10.5 Hz), 4.89 (1H, d, J = 11.2 Hz), 4.82 (1H, d, J = 11.2 Hz), 4.66 (1H, d, J = 11.2 Hz), 4.59 (1H, d, J = 11.2 Hz), 4.54(1H, d, J = 11.9 Hz), 4.48 (1H, d, J = 11.9 Hz), 3.72 (1H, t, J = 9.1 Hz, H-4 or H-5), 3.66-3.61 (3H, m, H-7a, H-7b and H-5 or H-4), 3.49 (1H, dt, J = 9.1, 2.1 Hz., H-2), 3.37-3.32 (2H, m, H-3 and H-6), 3.18 (1H, dd, J = 14.0, 2.1 Hz, H-1a), 2.77 (1H, dd, J = 14.0, 9.1 Hz, H-1b).

13C-NMR (CDCl3, 75 MHz):  192.00, 146.39, 138.62, 138.37, 138.24, 134.90, 130.40, 129.71, 128.67, 128.60, 128.55, 128.48, 128.01, 127.90, 127.84, 127.81, 127.75, 87.55, 81.88, 79.73, 79.23, 78.85, 75.80, 75.37, 75.20, 73.65, 69.24, 38.41.

ESI MS (calcd for C42H42O6: 642) *m/z* (rel. intensity): 667 (12), 666 (43), 665 (M+Na+) (91), 662 (9), 661 (44), 660 (M+NH4+) (100).

**5,10,15-triphenyl-20-[(2,6-anhydro-1-deoxy-3,4,5,7-tetrakis-*O*-benzyl-**-d-gluco-heptitol-1-yl)phenyl]porphyrin** **(10).** A mixture of the aldehyde **9** (108 mg, 0.17 mmol), benzaldehyde (54mg, 0.51 mmol), pyrrole (46 mg, 0.68 mmol) and NaCl (1 g, 20 mmol) in dichloromethane (67 ml) was purged with nitrogen under stirring. The flask was shielded from the light and BF3OEt2 (9.9 l, 0.070 mmol) was added to the mixture. The mixture was stirred under nitrogen at room temperature for 5 hours. DDQ (134 mg, 0.59 mmol) was added and the mixture was stirred for 30 min. A saturated solution of NaHCO3 (50 ml) was added, the organic layer was collected, dried over Na2SO4 and then the solvent was removed in vacuo. The main product **10** (30 mg, 15%) was isolated by flash column chromatography (eluent: CH2Cl2).

1H-NMR (CDCl3, 300 MHz): 8.87-8.78 (8H, m), 8.25-8.19 (6H, m), 8.10 (2H, d, J = 8.1 Hz), 7.79-7.71 (9H, m), 7.65 (2H, d, J = 8.1 Hz), 7.47-7.15 and 7.10-7.02 (20H, m), 5.10-4.80 and 4.71-4.60 (8H, m, series of overlapping ABq, Bn), 3.90-3.73 (5H, m), 3.60-3.46 (3H, m), 3.08 (1H, dd, J = 14.6, 8.8 Hz, H-1), -2.77 (2H, s).

13C-NMR (CDCl3, 75 MHz):  142.35, 140.05, 138.79, 138.49, 138.42, 134.68, 134.57, 131.24, 128.72, 128.63, 128.56, 128.46, 128.14, 128.06, 127.93, 127.88, 127.81, 127.76, 127.60, 126.80, 120.51, 120.22, 120.15, 87.78, 82.20, 80.35, 79.47, 79.08, 75.88, 75.51, 75.24, 73.79, 69.49, 38.16.

UV-Vis (CHCl3) max, nm: 419, 515, 551, 590, 646.

ESI MS (calcd for C79H66N4O5: 1150) *m/z* (rel. intensity): 1154 (15, 1153 (39), 1152 (92), 1151 (100).

**5,10,15,20-Tetrakis-[(2,6-anhydro-1-deoxy-3,4,5,7-tetrakis-*O*-benzyl-**-d-gluco-heptitol-1-yl)phenyl]porphyrin** **(11).** A mixture of the aldehyde **9** (173 mg, 0.27 mmol), pyrrole (18 mg, 0.27 mmol) and NaCl (350 mg, 6 mmol) in dichloromethane (27 ml) was purged with nitrogen under stirring. The flask was shielded from the light and BF3OEt2 (3.4 l, 0.027 mmol) was added to the mixture. The mixture was stirred under nitrogen at room temperature for 5 hours. DDQ (57 mg, 0.25 mmol) was added and the dark mixture was stirred for 40 min. The mixture was washed with a saturated solution of NaHCO3. The organic layer was dried over Na2SO4 and the solvent was evaporated. Flash column chromatography (eluent: CH2Cl2, EtOAc 10%) yielded the porphyrin **11** (100 mg, 53%).

1H-NMR (CDCl3, 500 MHz):  8.80 (8H, s), 8.10 (8H, d, J = 7.7 Hz), 7.66 (8H, d, J = 7.7 Hz), 7.47-7.23 (68H, m), 7.18 (8H, t, J = 7.7 Hz), 7.05 (8H, t, J = 7.2 Hz), 5.09 (4H, d, J = 11.0 Hz), 5.02(4H, d, J = 11.0 Hz), 4.99 (4H, d, J = 11.0 Hz), 4.90 (4H, d, J = 11.0 Hz), 4.85 (4H, d, J = 11.0 Hz), 4.69 (4H, d, J = 11.0 Hz), 4.68 (4H, d, J = 12.4 Hz), 4.62 (4H, d, J = 12.4 Hz), 3.88 (4H, t, J = 9.0 Hz, H-4 or H-5), 3.86-3.77 (16H, m,H-7a, H-7b, H-2 and H-5 or H-4), 3.58 (4H, t, J = 9.0, H-3), 3.60-3.55 (4H, m,H-6), 3.50 (4H, d, J = 14.1, H-1a), 3.09 (4H, dd, J = 14.1, 9.0, H-1b), -2.78 (2H, s).

13C-NMR (CDCl3, 75 MHz):  140.18, 138.80, 138.49, 138.45, 134.61, 131.28 (b), 128.72, 128.63, 128.57, 128.46, 128.15, 128.06, 127.93, 127.87, 127.78, 127.62, 120.23, 87.79, 82.26, 80.44, 79.47, 79.09, 75.88, 75.55, 75.25, 73.80, 69.48, 38.20.

UV-Vis (CHCl3) max, nm: 422, 517, 553, 592, 647.

ESI MS (calcd for C184H174N4O20: 2758) *m/z* (rel. intensity): 2766 (18), 2765 (15), 2764 (50), 2763 (38), 2762 (80), 2761 (100), 2760 (12).

**5,10,15-triphenyl-20-[(2,6-anhydro-1-deoxy-**-d-gluco-heptitol-1-yl)phenyl]porphyrin (12) and 5,10,15,20-Tetrakis-[(2,6-Anhydro-1-deoxy-**-d-gluco-heptitol-1-yl)phenyl]-porphy-rin** **(13).** The porphyrin **10** or **11** was dissolved in EtOAc (1 ml per 10 mg of porphyrin) and MeOH (1 ml per 10 mg of porphyrin). Pd 10% wt on C (1 mg per mg of porphyrin) was added. The mixture was degassed and then stirred under H2 overnight. The mixture was filtered over celite and the solvent was removed in vacuo to yield the porphyrin **12** or **13** (95-96%).

**12**

1H-NMR (CDCl3/CD3OD = 3/1, 500 MHz):  8.82-8.64 (8H, m), 8.13 (6H, d, J = 6.4 Hz), 8.04 (2H, d, J = 7.9 Hz), 7.71-7.66 (9H, m), 7.58 (2H, d, J = 7.9 Hz), 3.85 (1H, dd, J = 11.9, 3.1 Hz), 3.74 (1H, dd, J = 11.9, 3.1 Hz), 3.67 (1H, dd, J = 11.9, 3.1 Hz), 3.49-3.41 (2H, m), 3.35-3.27 (3H, m), 2.97 (1H, dd, J = 14.3, 8.9 Hz).

13C-NMR (CDCl3, 75 MHz): 142.02, 139.81, 138.39, 134.42, 134.33, 127.71, 127.66, 126.58, 126.205, 120.213, 120.06, 120.02, 80.23, 79.39, 78.69, 73.88, 70.97, 62.48, 37.81.

UV-Vis (CH3OH) max, nm: 413, 512, 547, 588, 645.

ESI MS (calcd for C51H42N4O5: 790) *m/z* (rel. intensity): 793(22), 792(56), 791(100).

**13**

UV-Vis (CH3OH) max, nm: 415, 513, 547, 593, 649.

ESI MS (calcd for C72H78N4O20: 1318) *m/z* (rel. intensity): 1323 (7), 1322 (14), 1321 (44), 1320 (78), 1319 (100).

*Synthesis of thio-sugar Porphyrins.* 5,10,15,20-tetrakis(pentafluorophenyl) porphyrin (TPFPP) 16.8mg and thio-sugar 30.1mg (1--D-thioglucose or 1--D-thiogalactose, sodium salt) (mole ratio 1:8) were dissolved in 5mL DMF16 (purified on a basic allumina column). The reaction mixture stirred in the dark at room temperature for 4 to 5 hours, at which time TLC showed all the starting porphyrin had reacted. To ensure that all 4 substitution reactions have occurred, the solution is stirred a further 8-10 hours. After removing the solvent under reduced pressure, the crude material was purified by column chromatography, eluted by ethyl acetate/methanol. 5,10,15,20-tetrakis-(4-1’-thio-glucose-2,3,5,6-tetrafluorophenyl)porphyrin and 5,10,15,20-tetrakis-(4-1’-thio-galactose-2,3,5,6-tetrafluorophenyl)porphyrin were synthesized in 90% and 80% yields, respectively. The products were confirmed by Electrospray Ionization Mass Spectrum (ESI-MS) and 1H-NMR. Glucose derivative, ESI-MS calcd. 1678, found 1679 as H+ ion. Galactose derivative, ESI-MS calcd. 1678, found 1679 as H+ ion. In order to accurately characterize the compounds by NMR, the tetra acetate derivatives were synthesized by mixing 48 equivalents acetic anhydride, 0.1 equivalent DMAP and 1 equivalent thio-sugar porphyrin at room temperature in pyridine for 1 hour. The crude material was purified by column chromatography, eluted by hexane/chloroform. The products, again, are confirmed by Electrospray Ionization Mass Spectrum (ESI-MS) and 1H-NMR.

**5,10,15,20-tetrakis-(4-1’-thio-tetraacetate-glucose-2,3,5,6-tetrafluorophenyl)porphyrin**. 1H-NMR(CDCl3): 9.02 (s, 8H), pyrrole H; 5.38 (d, J=8.79Hz, 4H), H14; 5.22 (m,12H), H2H3H44; 5.32 (d, J=3.30Hz, 8H), 2H64; 3.91 (m, 4H), H54; 2.23 (s, 12H) OAc4; 2.10 (s, 12H), OAc4; 2.09 (s, 12H), OAc4; 2.08 (s, 12H), OAc4; -2.86 (s, 2H), pyrrole NH. ESI-MS calcd. 2351, found 2351.

**5,10,15,20-tetrakis-(4-1’-thio-tetraacetate-galactose-2,3,5,6-tetrafluorophenyl)porphyrin**, 1H-NMR(CDCl3): 8.92 (s, 8H), pyrrole H; 5.47 (d, J=3.30Hz, 4H), H44; 5.41 (t, J=9.88Hz, 4H), H24; 5.14 (m, 8H), H1H34; 4.26 (m, 4H), H64; 4.15 (m, 4H), H64; 4.05 (t, J=6.59Hz, 4H), H54; 2.18 (s, 12H), OAc4; 2.16 (s, 12H), OAc4; 2.00 (s, 12H), OAc4; 1.96 (s, 12H), OAc4; -2.94 (s, 2H), pyrrole NH. ESI-MS calcd. 2351, found 2351.

[Ref.: S. J. Shaw, K. J. Elgie, C. Edwards, R. W. Boyle. *Tetrahedron Letters,* 1999, **40**, 1595.

*Partition Coefficient.* The octanol-water partition coefficient measurement is as follows: A small amount porphyrin is dissolved in 3 mL octanol in a 8.3 mL vial, then 3 mL water is added into the octanol solution. The mixture is shaken vigorously and then centrifuged for 10 min to accelerate the separation. The Soret absorption in those two layers is measured, and the ratio of the absorption in octanol over the absorption in water is the partition coefficient.

*Plasmid DNA Photocleavaged by Porphyrins.* As an indicator of bioactivity, photocleavage experiments can be carried out. The selected porphyrin (5M) was incubated with supercoiled plasmid DNA X174 (2g) overnight in the dark at room temperature and then irradiated for up to 90 min at 35oC with regular lamplight. 1% agarose gel electrophoresis (stained by 0.2g/ml ethidium bromide) was performed for 3 hours and photographed afterwards. Band difference will demonstrate the degree of plasmid degradation (nicked form and linear form) by the porphyrin. [Ref.: Benjamin R. Munson, Robert J. Fiel. *Nucleic Acids Research*. 1992, **20**,1315.

Instrumentation:

ESI-MS: HP-1100 LC/MSD, porphyrin compounds are dissolved in acetonitrile with 10% v/v TFA, with a fragmenter at 300-350V. NMR: Varian 300 MHz.
